# Supplementary material
Source: publisher site journal article supplement (https://www.spandidos-publications.com/6855/downloadSupplementary)

Figure S1. Apoptosis assay with Annexin V-FITC/PI staining.

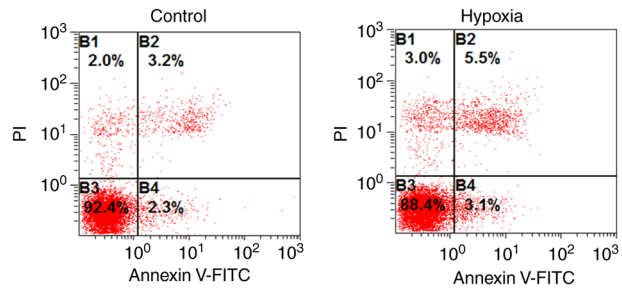

Figure S2. Western blot analysis of the protein expression levels of CCS following siRNA-NC and siRNA-CCS transfection. CCS, copper chaperone for superoxide dismutase; NC, normal control; siRNA, small interfering RNA.

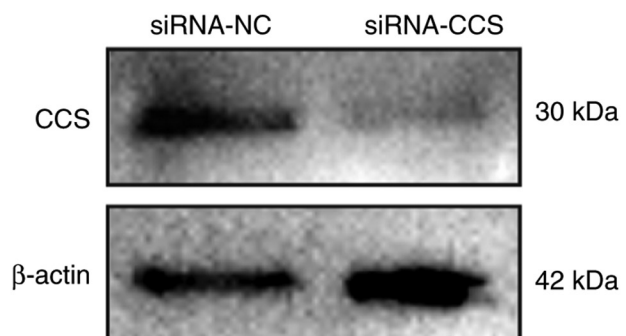

Supplement: Supplementary file 1 [file downloadSupplementary]
